# Supplementary material for: Initiation on the divergent Type I cadicivirus IRES: factor requirements and interactions with the translation apparatus
Source: PubMed Central journal article supplement — Nucleic Acids Res. 2016 Feb 11;44(7):3390–407. doi: 10.1093/nar/gkw074 (PMC4838371; doi:10.1093/nar/gkw074), 2016-02-11
Supplement: supp_gkw074_nar-03090-y-2015-File009.pdf [file supp_gkw074_nar-03090-y-2015-File009.pdf]

**Initiation on the divergent Type I cadicivirus IRES: factor requirements  
and interactions with the translation apparatus**

**Mukta Asnani<sup>1</sup>, Tatyana V. Pestova<sup>1</sup> and Christopher U. T. Hellen<sup>1\*</sup>**

<sup>1</sup>Department of Cell Biology, SUNY Downstate Medical Center, Brooklyn, NY, USA

**\* Corresponding author:** Christopher Hellen  
Department of Cell Biology,  
SUNY Downstate Medical Center,  
450 Clarkson Avenue, Box 44,  
Brooklyn, NY 11203  
Ph 718-270-1034  
Fax 718-270-2656  
Email: [christopher.hellen@downstate.edu](mailto:christopher.hellen@downstate.edu)

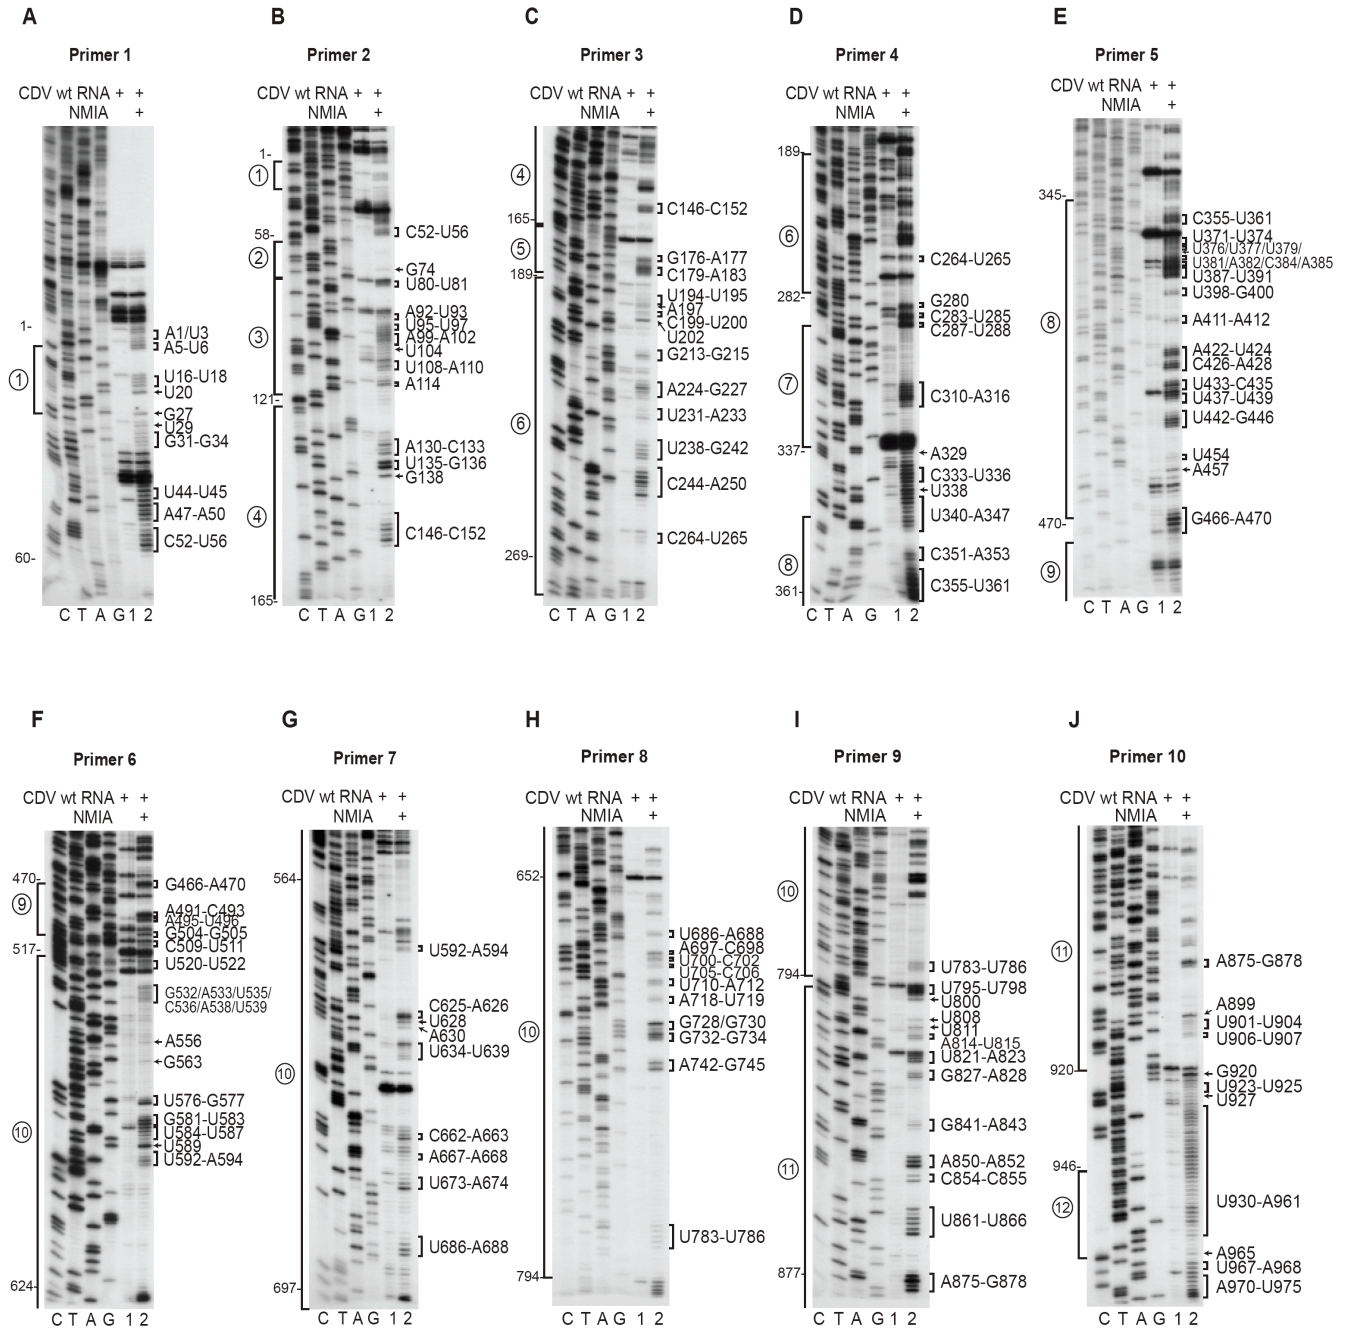

**Figure S1. SHAPE probing of the CDV 5'UTR.**

(A-J) Denaturing acrylamide gels showing primer extension analysis of the CDV 5'UTR treated with DMSO as a control (lane 1) or 13mM NMIA in DMSO (lane 2), and assayed using primers described in Materials and Methods. Reference lanes A, T, G, and C depict the CDV 5'UTR sequence. The positions of nucleotides and sites of modification are indicated on the left and right hand sides of gels respectively; domains are labeled on the left.

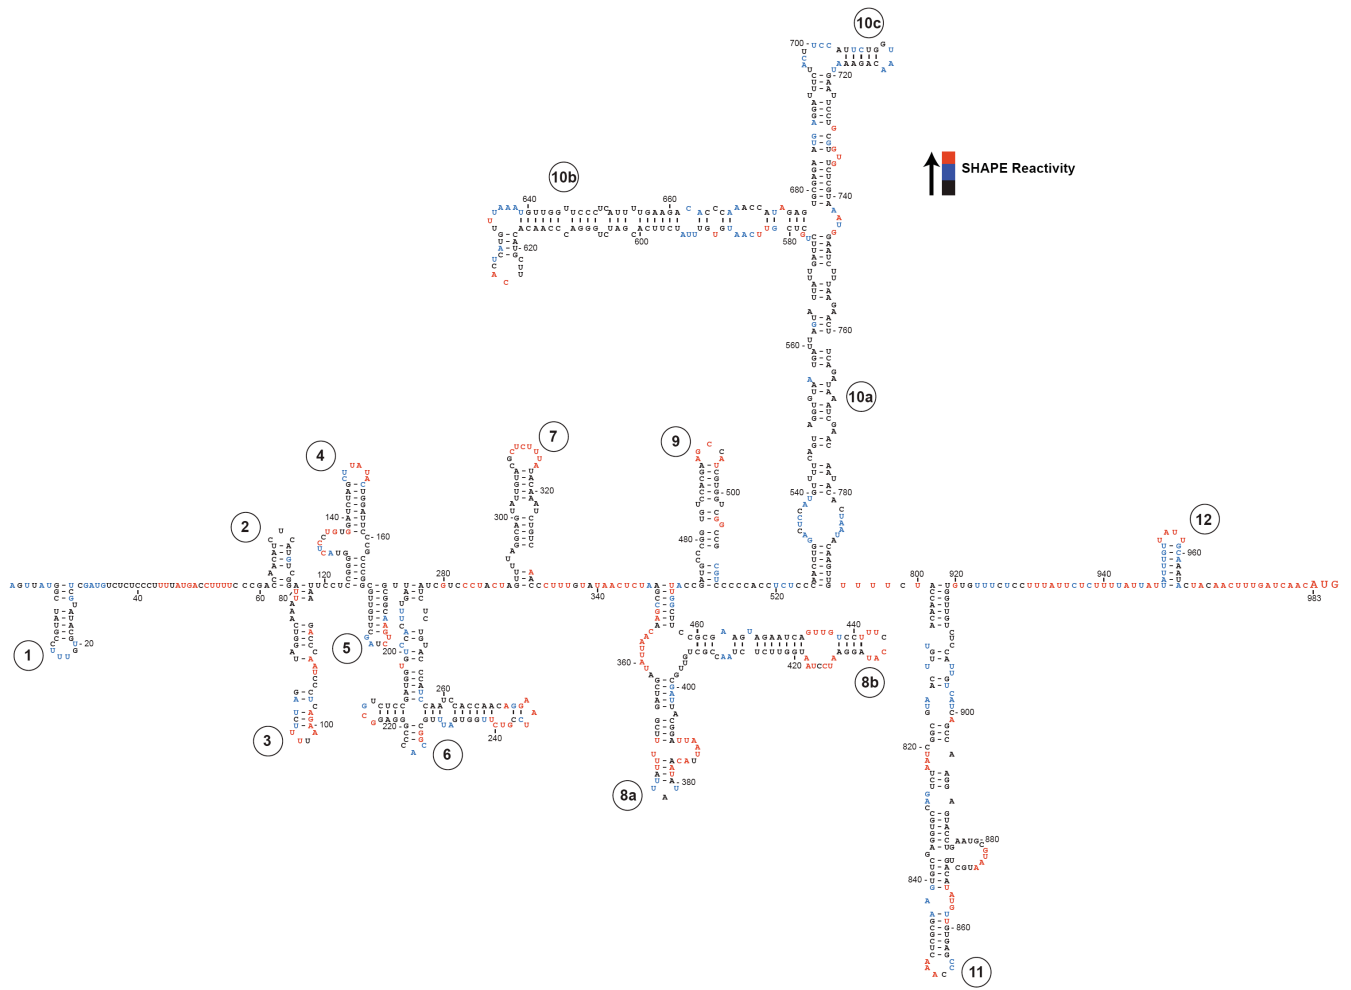

**Figure S2. Secondary structure model of the complete CDV 5'UTR.**

Model of the 5'UTR of CDV strain 209 with domains labeled and nucleotides color-coded to show reactivity to NMIA according to the code shown in the inset table.
